# Supplementary material for: Five-year follow-up with the PreserFlo MicroShunt for open-angle glaucoma
Source: Springer Nature journal article supplement (doi:10.1038/s41433-025-03707-3), 2025-02-20

**Supplementary Figure 1.** Flow chart of patient progress and reasons of study discontinuation during follow-up.

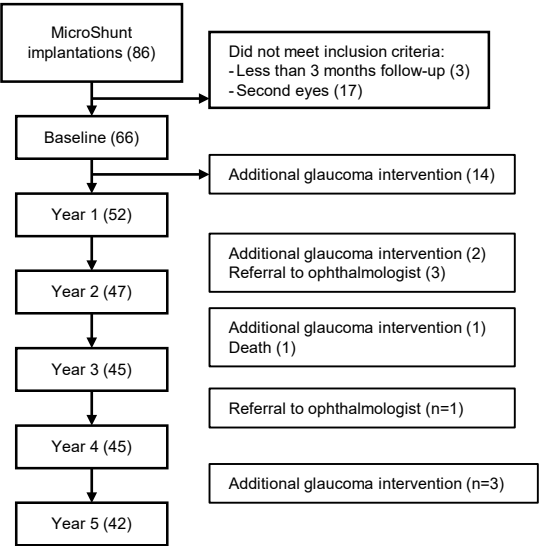

Supplement: MOESM1 [file 41433_2025_3707_MOESM1_ESM.pdf]
